# Supplementary material for: Temporal variation in antibiotic environments slows down resistance evolution in pathogenic Pseudomonas aeruginosa
Source: PubMed Central journal article supplement (PMC4662347; doi:10.1111/eva.12330), 2015-10-07

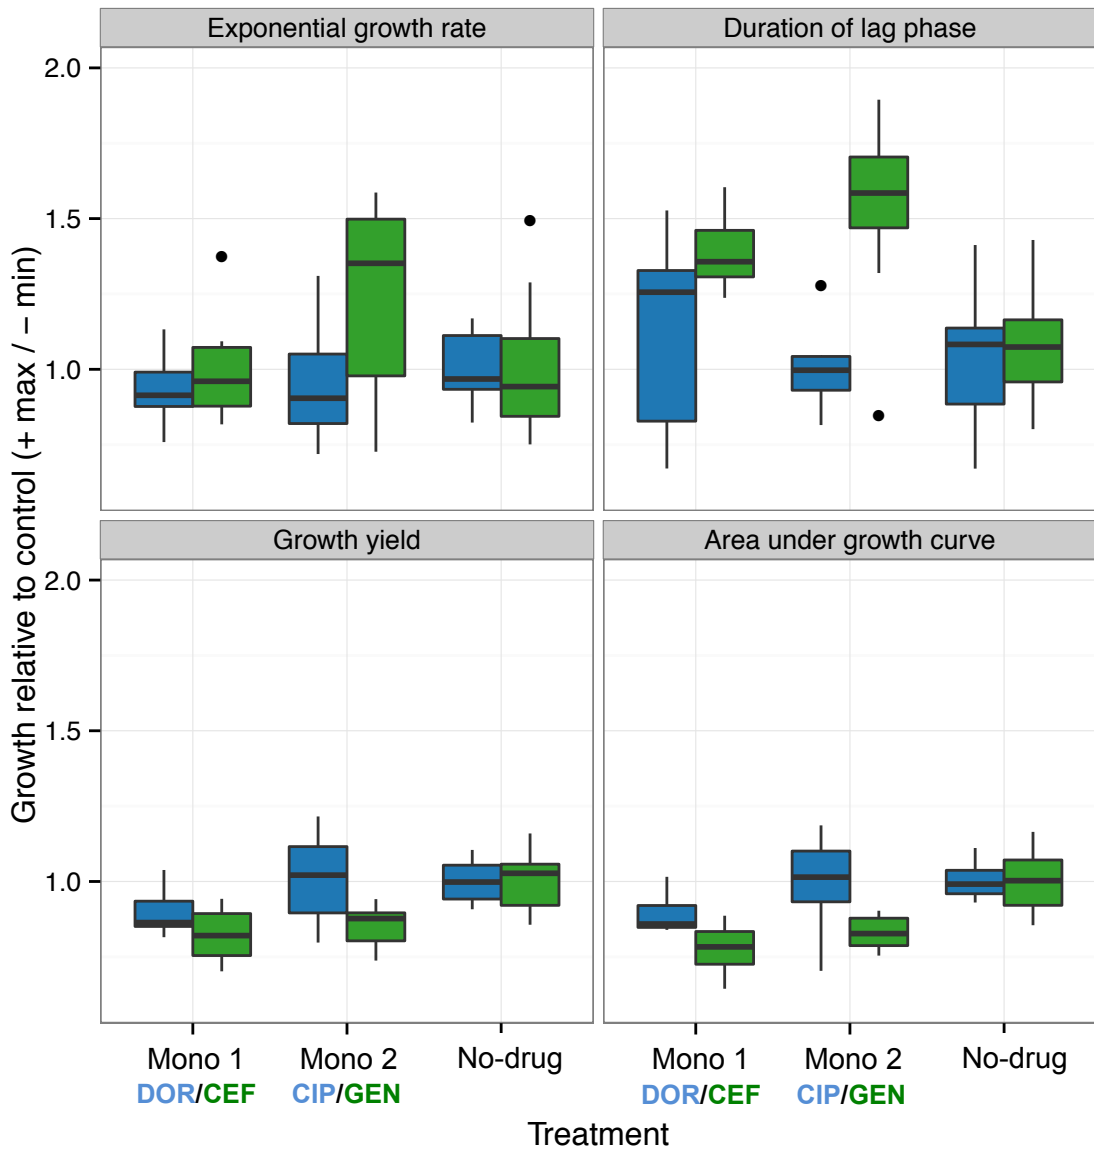

Supplement: eva0008-0945-sd5.pdf [file eva0008-0945-sd5.pdf]
